# Supplementary material
Source: Royal Society of Chemistry journal article supplement (doi:10.1039/d6cc02195f)
Supplement: d6cc02195f1.pdf [file d6cc02195f1.pdf]

## Supporting Information

### Organic Ammonium Flexibility Modulated Phase-Transition Behaviour in 3D Perovskite-like Mixed-valence Iron Complexes

#### Experimental section

##### Materials

All chemicals were reagent grade and used as purchased without further purification.

##### Synthesis

[HPy]<sub>2</sub>[Fe<sup>III</sup>Fe<sup>II</sup><sub>2</sub>(HCOO)<sub>7</sub>(C<sub>2</sub>O<sub>4</sub>)] (**1**): 0.10 g FeC<sub>2</sub>O<sub>4</sub>·2H<sub>2</sub>O and 1 mL of HCOOH were added to a 25 ml Teflon-lined stainless-steel autoclave, then, 1 mL of pyridine were added dropwise. The mixture was sealed and placed in an oven at 110 °C for 72 h without disturbance, then slowly cooled to room temperature at the rate of 2 °C/h. The black rod-shaped crystals of **1** were obtained with a yield of ~40% based on Fe.

[HTHPM]<sub>2</sub>[Fe<sup>III</sup>Fe<sup>II</sup><sub>2</sub>(HCOO)<sub>7</sub>(C<sub>2</sub>O<sub>4</sub>)] (**2**): The synthesis of **2** is similar to that of **1**, except that 0.16 g FeCl<sub>3</sub>·6H<sub>2</sub>O, 0.24 g FeCl<sub>2</sub>·4H<sub>2</sub>O, 0.04 g H<sub>2</sub>C<sub>2</sub>O<sub>4</sub>·2H<sub>2</sub>O, 2 ml of HCOOH and 1 ml of 1,3-propanediamine were used. The black rod-shaped crystals of **2** were obtained with a yield of ~40% based on Fe. 3,4,5,6-tetrahydropyrimidin-1-ium (THPM) cations was generated *in situ* by the reaction of 1,3-propanediamine with HCOOH.<sup>S1</sup>

[HMPID]<sub>2</sub>[Fe<sup>III</sup>Fe<sup>II</sup><sub>2</sub>(HCOO)<sub>7</sub>(C<sub>2</sub>O<sub>4</sub>)] (**3**): The synthesis of **3** is similar to that of **1**, except that 0.16 g FeCl<sub>3</sub>·6H<sub>2</sub>O, 0.16 g FeCl<sub>2</sub>·4H<sub>2</sub>O, 0.04 g H<sub>2</sub>C<sub>2</sub>O<sub>4</sub>·2H<sub>2</sub>O, 1 ml of HCOOH and 1 ml of N-methylpyrrolidinamine were used. The black rod-shaped crystals are obtained. The estimated yield based on Fe is approximately 40%.

[HPID]<sub>2</sub>[Fe<sup>III</sup>Fe<sup>II</sup><sub>2</sub>(HCOO)<sub>7</sub>(C<sub>2</sub>O<sub>4</sub>)] (**4**): The synthesis of **4** is similar to that of **1**, except that 0.16 g FeCl<sub>3</sub>·6H<sub>2</sub>O, 0.16 g FeCl<sub>2</sub>·4H<sub>2</sub>O, 0.04 g H<sub>2</sub>C<sub>2</sub>O<sub>4</sub>·2H<sub>2</sub>O, 1.5 ml of HCOOH and 2 ml of pyrrolidinamine were used. The black rod-shaped crystals are obtained. The estimated yield based on Fe is approximately 40%.

**Characterization Methods.** The PXRD spectra were recorded on a rigaku D/Max-2500 diffractometer at 40kV, 100mA for a Cu-target tube and a graphite monochromator. Simulation of the PXRD spectrum was carried out by the Single-crystal data and diffraction-crystal module of the Mercury (Hg) program available free of charge via the internet at <http://www.iucr.org>. Magnetic susceptibility was measured by a Quantum Design MPMS superconducting quantum interference device (SQUID). Diamagnetic corrections were estimated by using Pascal constants and background corrections by experimental measurement on sample holders. Thermogravimetric (TGA) analyses were carried out on a Rigaku standard TG-DTA analyzer with a heating rate of 10°C min<sup>-1</sup> from ambient temperature to 800°C under nitrogen gas. Differential scanning calorimetry (DSC) measurements were performed on a NETZSCH Analyzing under nitrogen at atmospheric pressure with a heating/cooling rate of 5 K min<sup>-1</sup> for **2** and **3** but 5 K min<sup>-1</sup> for **4**. Dielectric constant was measured with a Gwinstek LCR-meter over the frequency range of 500 Hz and 1 MHz at a heating/cooling rate of 2 K min<sup>-1</sup> from 110 to 400 K. The temperature of the sample was controlled by the liquid nitrogen thermostat with an East changing TC280 Temperature Controller with uncertainty < 0.1 K.

**X-ray Data Collection and Structure Determinations.** The single-crystal X-ray diffraction data for **1** (273.15 K), **2** (379.98 and 293 K), **3** (292.69 and 400.15 K) and **4** (100, 299.17 and 370.15 K) were collected on a Rigaku SCXmini/XtaLAB AFC12/ Bruker D8 Venture single crystal X-ray diffractometer with Mo K $\alpha$  radiation ( $\lambda = 0.71073 \text{ \AA}$ ). The structure was determined directly by ShelXT and refined by full matrix least-squares methods using ShelXL with Olex2.<sup>S2</sup> It was further refined on F<sup>2</sup> with anisotropic thermal parameters. Hydrogen atoms were generated geometrically or from Fourier maps, and refined isotropically with fixed thermal factors. The detailed crystallographic data are listed in **Table S1**.

**Table S1.** Crystallographic Data for **1, 2, 3** and **4**.

| Complexes                                             | <b>1</b>                                                                       | <b>2LTP</b>                                                                    | <b>2HTP</b>                                                                    | <b>3LTP</b>                                                                    |
|-------------------------------------------------------|--------------------------------------------------------------------------------|--------------------------------------------------------------------------------|--------------------------------------------------------------------------------|--------------------------------------------------------------------------------|
| Empirical formula                                     | C <sub>19</sub> H <sub>19</sub> Fe <sub>3</sub> N <sub>2</sub> O <sub>18</sub> | C <sub>17</sub> H <sub>25</sub> Fe <sub>3</sub> N <sub>4</sub> O <sub>18</sub> | C <sub>17</sub> H <sub>25</sub> Fe <sub>3</sub> N <sub>4</sub> O <sub>18</sub> | C <sub>19</sub> H <sub>31</sub> Fe <sub>3</sub> N <sub>2</sub> O <sub>18</sub> |
| Formula weight                                        | 730.91                                                                         | 740.96                                                                         | 740.96                                                                         | 743.01                                                                         |
| Temperature/K                                         | 273.15                                                                         | 293(2)                                                                         | 379.98(10)                                                                     | 292.69(18)                                                                     |
| Crystal system                                        | orthorhombic                                                                   | orthorhombic                                                                   | tetragonal                                                                     | orthorhombic                                                                   |
| Space group                                           | <i>P</i> 2 <sub>1</sub> 2 <sub>1</sub> 2 <sub>1</sub>                          | <i>P</i> 2 <sub>1</sub> 2 <sub>1</sub> 2 <sub>1</sub>                          | <i>P</i> <sup>2</sup> <sub>1</sub> m                                           | <i>P</i> 2 <sub>1</sub> 2 <sub>1</sub> 2 <sub>1</sub>                          |
| <i>a</i> /Å                                           | 11.973(2)                                                                      | 11.9937(9)                                                                     | 15.1110(12)                                                                    | 12.1064(8)                                                                     |
| <i>b</i> /Å                                           | 14.917(3)                                                                      | 15.1397(9)                                                                     | 15.1110(12)                                                                    | 15.2095(13)                                                                    |
| <i>c</i> /Å                                           | 15.127(3)                                                                      | 15.2063(11)                                                                    | 6.0078(7)                                                                      | 15.3444(10)                                                                    |
| Volume/Å <sup>3</sup>                                 | 2701.6(9)                                                                      | 2761.2(3)                                                                      | 1371.8(3)                                                                      | 2825.4(4)                                                                      |
| <i>Z</i>                                              | 4                                                                              | 4                                                                              | 2                                                                              | 4                                                                              |
| $\rho$ (g/cm <sup>3</sup> )                           | 1.797                                                                          | 1.782                                                                          | 1.794                                                                          | 1.747                                                                          |
| $\mu$ (MoK $\alpha$ )/mm <sup>-1</sup>                | 1.677                                                                          | 1.643                                                                          | 1.654                                                                          | 1.604                                                                          |
| <i>F</i> (000)                                        | 1476                                                                           | 1508                                                                           | 754                                                                            | 1524                                                                           |
| Reflections collected                                 | 4744                                                                           | 8714                                                                           | 7484                                                                           | 16106                                                                          |
| Goodness-of-fit on <i>F</i>                           | 1.103                                                                          | 0.983                                                                          | 1.077                                                                          | 1.052                                                                          |
| Final <i>R</i> indexes [ <i>I</i> ≥2<br>( <i>I</i> )] | <i>R</i> <sub>1</sub> = 0.0387, <i>wR</i> <sub>2</sub> =<br>0.1028             | <i>R</i> <sub>1</sub> = 0.0316, <i>wR</i> <sub>2</sub> =<br>0.0650             | <i>R</i> <sub>1</sub> = 0.0383, <i>wR</i> <sub>2</sub> =<br>0.1004             | <i>R</i> <sub>1</sub> = 0.0594, <i>wR</i> <sub>2</sub> =<br>0.1327             |
| Final <i>R</i> indexes [all<br>data]                  | <i>R</i> <sub>1</sub> = 0.0456, <i>wR</i> <sub>2</sub> =<br>0.1110             | <i>R</i> <sub>1</sub> = 0.0760, <i>wR</i> <sub>2</sub> =<br>0.0828             | <i>R</i> <sub>1</sub> = 0.0404, <i>wR</i> <sub>2</sub> =<br>0.1018             | <i>R</i> <sub>1</sub> = 0.0786, <i>wR</i> <sub>2</sub> =<br>0.1433             |
| Complexes                                             | <b>3HTP</b>                                                                    | <b>4LTP</b>                                                                    | <b>4ITP</b>                                                                    | <b>4HTP</b>                                                                    |
| Empirical formula                                     | C <sub>19</sub> H <sub>31</sub> Fe <sub>3</sub> N <sub>2</sub> O <sub>18</sub> | C <sub>17</sub> H <sub>25</sub> Fe <sub>3</sub> N <sub>2</sub> O <sub>18</sub> | C <sub>17</sub> H <sub>27</sub> Fe <sub>3</sub> N <sub>2</sub> O <sub>18</sub> | C <sub>17</sub> H <sub>27</sub> Fe <sub>3</sub> N <sub>2</sub> O <sub>18</sub> |
| Formula weight                                        | 743.01                                                                         | 712.94                                                                         | 714.95                                                                         | 714.95                                                                         |
| Temperature/K                                         | 400.15(3)                                                                      | 100                                                                            | 299.17(10)                                                                     | 370.15                                                                         |
| Crystal system                                        | tetragonal                                                                     | orthorhombic                                                                   | orthorhombic                                                                   | tetragonal                                                                     |
| Space group                                           | <i>P</i> <sup>2</sup> <sub>1</sub> m                                           | <i>P</i> 2 <sub>1</sub> 2 <sub>1</sub> 2 <sub>1</sub>                          | <i>P</i> nma                                                                   | <i>P</i> 4/ <i>mbm</i>                                                         |
| <i>a</i> /Å                                           | 15.2085(9)                                                                     | 11.804(2)                                                                      | 15.0662(11)                                                                    | 14.9876(15)                                                                    |
| <i>b</i> /Å                                           | 15.2085(9)                                                                     | 14.956(2)                                                                      | 11.9292(7)                                                                     | 14.9876(15)                                                                    |
| <i>c</i> /Å                                           | 6.0484(6)                                                                      | 14.961(3)                                                                      | 15.1536(10)                                                                    | 5.9643(9)                                                                      |

---

|                               |                                                      |                                                      |                                                      |                                                      |
|-------------------------------|------------------------------------------------------|------------------------------------------------------|------------------------------------------------------|------------------------------------------------------|
| Volume/Å <sup>3</sup>         | 1399.0(2)                                            | 2641.3(8)                                            | 2723.5(3)                                            | 1339.7(3)                                            |
| Z                             | 2                                                    | 4                                                    | 4                                                    | 2                                                    |
| ρ(g/cm <sup>3</sup> )         | 1.764                                                | 1.793                                                | 1.744                                                | 1.772                                                |
| μ(MoKα)/mm <sup>-1</sup>      | 1.620                                                | 1.712                                                | 1.661                                                | 1.688                                                |
| F(000)                        | 762                                                  | 1452                                                 | 1460                                                 | 730                                                  |
| Reflections collected         | 15443                                                | 19026                                                | 14797                                                | 12503                                                |
| Goodness-of-fit on F          | 1.051                                                | 1.030                                                | 1.173                                                | 1.080                                                |
| Final R indexes [I≥2<br>(I)]  | R <sub>1</sub> = 0.0610, wR <sub>2</sub> =<br>0.1369 | R <sub>1</sub> = 0.0501, wR <sub>2</sub> =<br>0.1245 | R <sub>1</sub> = 0.0676, wR <sub>2</sub> =<br>0.1560 | R <sub>1</sub> = 0.0648, wR <sub>2</sub> =<br>0.1730 |
| Final R indexes [all<br>data] | R <sub>1</sub> = 0.1123, wR <sub>2</sub> =<br>0.1682 | R <sub>1</sub> = 0.0554, wR <sub>2</sub> =<br>0.1296 | R <sub>1</sub> = 0.0959, wR <sub>2</sub> =<br>0.1695 | R <sub>1</sub> = 0.0921, wR <sub>2</sub> =<br>0.2005 |

---

**Table S2.** The bonds lengths of **1**, **2**, **3** and **4** in LTP.

| 1LTP                   |          | 2LTP                   |          | 3LTP                   |          | 4LTP                   |           |
|------------------------|----------|------------------------|----------|------------------------|----------|------------------------|-----------|
| Fe3-O1                 | 2.184(5) | Fe3-O1                 | 2.061(5) | Fe3-O1                 | 2.191(6) | Fe3-O1                 | 2.121(7)  |
| Fe3-O2                 | 2.131(5) | Fe3-O2                 | 2.068(4) | Fe3-O2                 | 2.149(7) | Fe3-O2                 | 2.121(5)  |
|                        |          |                        |          |                        |          |                        | 2.072(15) |
| Fe3-O5                 | 2.114(5) | Fe3-O5                 | 2.015(4) | Fe3-O5                 | 2.078(7) | Fe3-O5                 | )         |
| Fe3-O13                | 2.035(5) | Fe3-O13                | 1.971(4) | Fe3-O13                | 2.116(7) | Fe3-O15                | 2.051(5)  |
| Fe3-O15                | 2.102(5) | Fe3-O15                | 1.997(5) | Fe3-O15                | 2.090(6) | Fe3-O13                | 2.053(5)  |
| Fe3-O17                | 2.153(5) | Fe3-O17                | 1.998(4) | Fe3-O17                | 2.102(7) | Fe3-O17                | 2.073(5)  |
| Fe2-O3 <sup>i</sup>    | 2.061(5) | Fe2-O3 <sup>i</sup>    | 2.163(4) | Fe2-O3 <sup>i</sup>    | 2.101(8) | Fe2-O3 <sup>i</sup>    | 2.097(6)  |
| Fe2-O4 <sup>i</sup>    | 2.043(5) | Fe2-O4 <sup>i</sup>    | 2.192(5) | Fe2-O4 <sup>i</sup>    | 2.073(7) | Fe2-O4 <sup>i</sup>    | 2.119(5)  |
|                        |          |                        |          |                        |          |                        | 2.098(13) |
| Fe2-O6                 | 2.011(5) | Fe2-O6                 | 2.122(5) | Fe2-O6                 | 2.054(6) | Fe2-O6                 | )         |
| Fe2-O7                 | 1.970(5) | Fe2-O7                 | 2.059(5) | Fe2-O7                 | 2.049(6) | Fe2-O7                 | 2.045(6)  |
| Fe2-O11                | 1.982(5) | Fe2-O11                | 2.063(4) | Fe2-O11                | 2.044(7) | Fe2-O11                | 2.035(5)  |
| Fe2-O18 <sup>ii</sup>  | 2.009(5) | Fe2-O18 <sup>ii</sup>  | 2.140(5) | Fe2-O18 <sup>ii</sup>  | 2.041(7) | Fe2-O18 <sup>ii</sup>  | 2.074(5)  |
| Fe1-O8                 | 2.146(6) | Fe1-O8                 | 2.114(5) | Fe1-O8                 | 2.084(7) | Fe1-O8                 | 2.095(6)  |
| Fe1-O9                 | 2.116(6) | Fe1-O9                 | 2.097(5) | Fe1-O9                 | 2.069(6) | Fe1-O9                 | 2.068(5)  |
| Fe1-O10 <sup>vi</sup>  | 2.112(6) | Fe1-O10 <sup>vi</sup>  | 2.110(5) | Fe1-O10 <sup>vi</sup>  | 2.065(7) | Fe1-O10 <sup>vi</sup>  | 2.071(5)  |
| Fe1-O12 <sup>iii</sup> | 2.129(5) | Fe1-O12 <sup>iii</sup> | 2.150(5) | Fe1-O12 <sup>iii</sup> | 2.078(6) | Fe1-O12 <sup>iii</sup> | 2.104(4)  |
| Fe1-O14 <sup>v</sup>   | 2.091(6) | Fe1-O14 <sup>v</sup>   | 2.157(5) | Fe1-O14 <sup>v</sup>   | 2.076(7) | Fe1-O14 <sup>v</sup>   | 2.090(5)  |
| Fe1-O16 <sup>iv</sup>  | 2.133(5) | Fe1-O16 <sup>iv</sup>  | 2.207(5) | Fe1-O16 <sup>iv</sup>  | 2.060(6) | Fe1-O16 <sup>iv</sup>  | 2.092(5)  |

Symmetry Code for 1LTP, 3LTP and 4LTP: <sup>i</sup>-1/2+x,1/2-y,3-z; <sup>ii</sup>-1+x,+y,+z; <sup>iii</sup>1/2-x,1-y,-1/2+z; <sup>iv</sup>-1/2+x,1/2-y,2-z; <sup>v</sup>1-x,-1/2+y,5/2-z; <sup>vi</sup>1/2+x,1/2-y,2-z.

Symmetry Code for 2LTP: <sup>i</sup>-1/2+x,1/2-y,3-z; <sup>ii</sup>-1+x,+y,+z; <sup>iii</sup>1/2-x,1-y,1/2+z; <sup>iv</sup>-1/2+x,1/2-y,2-z; <sup>v</sup>1-x,-1/2+y,3/2-z; <sup>vi</sup>1/2+x,1/2-y,2-z.

**Table 3.** The bonds lengths of 2HTP, 3HTP, 4ITP and 4HTP.

| 2HTP                   |           | 3HTP                   |           | 4ITP                  |          | 4HTP                  |           |
|------------------------|-----------|------------------------|-----------|-----------------------|----------|-----------------------|-----------|
| Fe1-O9 <sup>vi</sup>   | 2.094(14) | Fe1-O9 <sup>vi</sup>   | 2.033(14) | Fe1-O1                | 2.084(3) | Fe1-O1                | 2.048(6)  |
| Fe1-O7                 | 2.139(8)  | Fe1-O7                 | 2.033(14) | Fe1-O1 <sup>i</sup>   | 2.084(3) | Fe1-O1 <sup>i</sup>   | 2.048(6)  |
| Fe1-O7 <sup>iii</sup>  | 2.139(8)  | Fe1-O7 <sup>iii</sup>  | 2.033(14) | Fe1-O2                | 2.095(4) | Fe1-O1 <sup>ii</sup>  | 2.048(6)  |
| Fe1-O8 <sup>iv</sup>   | 2.139(8)  | Fe1-O8 <sup>iv</sup>   | 2.068(14) | Fe1-O2 <sup>i</sup>   | 2.095(4) | Fe1-O1 <sup>iii</sup> | 2.048(6)  |
| Fe1-O8 <sup>ii</sup>   | 2.128(8)  | Fe1-O8 <sup>ii</sup>   | 2.069(14) | Fe1-O6 <sup>ii</sup>  | 2.101(4) | Fe1-O3 <sup>i</sup>   | 2.089(10) |
| Fe1-O10 <sup>iii</sup> | 2.076(14) | Fe1-O10 <sup>iii</sup> | 2.04(2)   | Fe1-O6 <sup>iii</sup> | 2.101(4) | Fe1-O3                | 2.089(10) |
| Fe2-O1                 | 2.114(7)  | Fe2-O1                 | 2.085(16) | Fe2-O3                | 2.061(4) | Fe2-O2 <sup>iv</sup>  | 2.058(7)  |
| Fe2-O3                 | 2.078(7)  | Fe2-O3                 | 2.067(13) | Fe2-O4                | 2.068(4) | Fe2-O5                | 2.111(6)  |

|                     |          |                     |           |                      |          |                      |          |
|---------------------|----------|---------------------|-----------|----------------------|----------|----------------------|----------|
| Fe2-O5              | 2.008(7) | Fe2-O5              | 2.027(13) | Fe2-O5               | 2.052(4) | Fe2-O5 <sup>iv</sup> | 2.111(6) |
| Fe2-O2 <sup>i</sup> | 2.090(7) | Fe2-O2 <sup>i</sup> | 2.150(16) | Fe2-O7               | 2.121(4) | Fe2-O4 <sup>v</sup>  | 2.083(7) |
| Fe2-O6 <sup>i</sup> | 1.990(7) | Fe2-O6 <sup>i</sup> | 2.083(13) | Fe2-O8 <sup>iv</sup> | 2.139(4) | Fe2-O4 <sup>vi</sup> | 2.083(7) |
| Fe2-O4 <sup>v</sup> | 2.060(7) | Fe2-O4 <sup>v</sup> | 2.044(14) | Fe2-O9               | 2.092(4) | Fe2-O2               | 2.058(7) |

Symmetry Code for **2HTP**: <sup>i</sup> 1/2-y,1/2-x,+z; <sup>ii</sup> 1-x,1-y,+z; <sup>iii</sup> +y,1-x,1-z; <sup>iv</sup> 1-y,+x,1-z; <sup>v</sup> 1/2-y,1/2-x,1+z; <sup>vi</sup> 1-y,x,-z;  
**3HTP**: <sup>i</sup> 1/2-y,1/2-x,+z; <sup>ii</sup> 1-x,1-y,+z; <sup>iii</sup> +y,1-x,1-z; <sup>iv</sup> 1-y,+x,1-z; <sup>v</sup> 1/2-y,1/2-x,1+z; <sup>vi</sup> 1-y,x,-z; **4ITP**: <sup>i</sup> 1-x,1-y,1-z; <sup>ii</sup> 1/2-x,1-y,1/2+z; <sup>iii</sup> 1/2+x,+y,1/2-z; <sup>iv</sup> 1-x,1-y,-z. **4HTP**: <sup>i</sup> 1-x, 1-y, -1-z; <sup>ii</sup> y,1-x,-1-z; <sup>iii</sup> 1-y, x, z; <sup>iv</sup> -1/2+y, 1/2+x,-1-z; <sup>v</sup> -1/2+y, 1/2+x, z; <sup>vi</sup> x, y, -1-z;

**Table S4.** The H-bonds lengths (Å) and angles (°) for **1**, **2**, **3** and **4**.

| Complex                                                                         | D   | H   | A                  | d(D-H)/Å | d(H-A)/Å | d(D-A)/Å  | D-H-A/° |
|---------------------------------------------------------------------------------|-----|-----|--------------------|----------|----------|-----------|---------|
| <b>1</b>                                                                        | N1  | H1  | O9 <sup>vi</sup>   | 0.86     | 2.01     | 2.864(17) | 169.6   |
|                                                                                 | N2  | H2  | O15 <sup>ii</sup>  | 0.86     | 1.93     | 2.760(10) | 163.0   |
|                                                                                 | N11 | H11 | O10 <sup>vi</sup>  | 0.86     | 2.04     | 2.904(18) | 177.0   |
| Symmetry Code: <sup>ii</sup> 1+x,+y,+z; <sup>vi</sup> 1/2+x,1/2-y,2-z;          |     |     |                    |          |          |           |         |
| <b>2LTP</b>                                                                     | N1  | H1  | O15                | 0.86     | 2.41     | 3.028(8)  | 129.5   |
|                                                                                 | N1  | H1  | O16                | 0.86     | 2.33     | 3.183(8)  | 174.9   |
|                                                                                 | N2  | H2  | O2 <sup>vii</sup>  | 0.86     | 2.69     | 3.218(8)  | 121.2   |
|                                                                                 | N2  | H2  | O4 <sup>vii</sup>  | 0.86     | 2.19     | 2.993(9)  | 156.0   |
|                                                                                 | N3  | H3  | O11                | 0.86     | 2.07     | 2.872(9)  | 155.2   |
|                                                                                 | N4  | H4  | O9                 | 0.86     | 2.54     | 3.226(9)  | 137.6   |
|                                                                                 | N4  | H4  | O10                | 0.86     | 2.21     | 3.036(9)  | 162.1   |
| Symmetry Code: <sup>vii</sup> 1-x,1/2+y,2/3-z;                                  |     |     |                    |          |          |           |         |
| <b>2HTP</b>                                                                     | N1  | H1  | O8                 | 0.86     | 1.85     | 2.70(4)   | 170.5   |
|                                                                                 | N2  | H2  | O1 <sup>v</sup>    | 0.86     | 2.28     | 2.94(3)   | 133.2   |
|                                                                                 | N11 | H11 | O5                 | 0.86     | 2.31     | 2.97(3)   | 133.9   |
|                                                                                 | N22 | H22 | O1 <sup>v</sup>    | 0.86     | 2.17     | 2.98(4)   | 157.2   |
| Symmetry Code: <sup>v</sup> +y, 1-x,-z;                                         |     |     |                    |          |          |           |         |
| <b>3LTP</b>                                                                     | N1  | H1  | O1                 | 0.98     | 2.08     | 2.94(4)   | 146.6   |
|                                                                                 | N2  | H2  | O7 <sup>vii</sup>  | 0.98     | 2.19     | 2.99(3)   | 138.0   |
|                                                                                 | N3  | H3  | O5 <sup>viii</sup> | 0.98     | 2.27     | 3.10(3)   | 140.8   |
|                                                                                 | N4  | H4  | O13                | 0.98     | 2.01     | 2.90(4)   | 150.1   |
| Symmetry Code: <sup>vii</sup> 1/2-x,1-y,1/2+z; <sup>viii</sup> 1-x,1/2+y,5/2-z; |     |     |                    |          |          |           |         |
| <b>3HTP</b>                                                                     | N1  | H1  | O2 <sup>vii</sup>  | 0.98     | 1.763    | 2.74(4)   | 174.38  |
|                                                                                 | N2  | H2  | O6 <sup>iv</sup>   | 0.98     | 2.01     | 2.93(3)   | 154.27  |
| Symmetry Code: <sup>iv</sup> 1-y,+x,1-z; <sup>vii</sup> x, y,-1+z               |     |     |                    |          |          |           |         |
| <b>4LTP</b>                                                                     | N1  | H1  | O11                | 0.91     | 1.87     | 2.779(15) | 174.5   |
|                                                                                 | N1  | H1  | O13                | 0.91     | 1.91     | 2.820(18) | 176.0   |
|                                                                                 | N2  | H2  | O19 <sup>v</sup>   | 0.91     | 2.17     | 3.05(3)   | 163.1   |
|                                                                                 | N2  | H2  | O13                | 0.91     | 1.91     | 2.820(18) | 176.0   |
|                                                                                 | N3  | H3  | O4                 | 0.91     | 2.05     | 2.961(9)  | 175.4   |
|                                                                                 | N3  | H3  | O7 <sup>v</sup>    | 0.91     | 2.11     | 2.961(10) | 155.4   |
| Symmetry Code: <sup>v</sup> 1-x,-1/2+y,5/2-z;                                   |     |     |                    |          |          |           |         |
| <b>4(ITP)</b>                                                                   | N1  | H1B | O3                 | 0.89     | 2.19     | 3.04(4)   | 160.9   |

|        |                                                                                                                                                                                     |     |                    |      |       |           |        |
|--------|-------------------------------------------------------------------------------------------------------------------------------------------------------------------------------------|-----|--------------------|------|-------|-----------|--------|
|        | N1                                                                                                                                                                                  | H1A | 08 <sup>v</sup>    | 0.89 | 2.29  | 3.16(4)   | 165.1  |
|        | N2                                                                                                                                                                                  | H2A | 03                 | 0.89 | 2.11  | 2.94(3)   | 153.4  |
|        | N2                                                                                                                                                                                  | H2B | 08 <sup>v</sup>    | 0.89 | 2.15  | 3.02(3)   | 165.3  |
|        | N3                                                                                                                                                                                  | H3B | 05                 | 0.89 | 1.98  | 2.865(12) | 175.9  |
|        | N3                                                                                                                                                                                  | H3A | 05 <sup>vi</sup>   | 0.89 | 1.98  | 2.865(12) | 175.9  |
|        | N4                                                                                                                                                                                  | H4B | 01 <sup>viii</sup> | 0.89 | 2.42  | 3.10(2)   | 133.5  |
|        | N4                                                                                                                                                                                  | H4B | 01 <sup>i</sup>    | 0.89 | 2.42  | 3.10(2)   | 133.5  |
|        | N4                                                                                                                                                                                  | H4A | 09 <sup>ii</sup>   | 0.89 | 2.48  | 3.27(2)   | 148.4  |
|        | N4                                                                                                                                                                                  | H4A | 09 <sup>vii</sup>  | 0.89 | 2.48  | 3.27(2)   | 148.4  |
|        | <sup>i</sup> 1-x,1-y,1-z; <sup>ii</sup> 1/2-x,1-y,1/2+z; <sup>v</sup> -1/2+x,+y,1/2-z; <sup>vi</sup> +x,3/2-y,+z; <sup>viii</sup> 1/2-x,1/2+y,1/2+z; <sup>viii</sup> 1-x,1/2+y,1-z; |     |                    |      |       |           |        |
|        | N1                                                                                                                                                                                  | H1a | 05                 | 0.89 | 2.14  | 3.00(5)   | 159.97 |
| 4(HTP) | N1                                                                                                                                                                                  | H1b | 02 <sup>vii</sup>  | 0.89 | 2.311 | 3.09(5)   | 145.12 |
|        | Symmetry Code: <sup>vii</sup> y,1-x, z                                                                                                                                              |     |                    |      |       |           |        |

**Table S5.** The magnetic phase transition temperatures of some typical iron formates.

| Topology                                                                          | Complex                                                                                                                                  | T <sub>N</sub> /T <sub>m</sub> (K) | Ref |
|-----------------------------------------------------------------------------------|------------------------------------------------------------------------------------------------------------------------------------------|------------------------------------|-----|
| (4 <sup>12</sup> ·6 <sup>3</sup> )                                                | [(CH <sub>3</sub> ) <sub>2</sub> NH <sub>2</sub> ] <sub>2</sub> Fe(HCOO) <sub>3</sub>                                                    | 18                                 | S3  |
|                                                                                   | [CH <sub>3</sub> NH <sub>2</sub> NH <sub>2</sub> ][Fe(HCOO) <sub>3</sub> ]                                                               | 21                                 | S4  |
|                                                                                   | [CH <sub>3</sub> NH <sub>3</sub> ] <sub>2</sub> Fe(HCOO) <sub>3</sub>                                                                    | 17                                 | S5  |
|                                                                                   | [NH <sub>2</sub> CHNH <sub>2</sub> ][Fe(HCOO) <sub>3</sub> ]                                                                             | 17.0                               | S6  |
|                                                                                   | [Fe(HCO <sub>2</sub> ) <sub>3</sub> ] <sub>n</sub> ·nHCO <sub>2</sub> H                                                                  | 20                                 | S7  |
|                                                                                   | [C(NH <sub>2</sub> ) <sub>3</sub> ][Fe <sup>II</sup> (HCOO) <sub>3</sub> ]                                                               | 10.0                               | S8  |
| (4 <sup>9</sup> ·6 <sup>6</sup> )                                                 | [NH <sub>2</sub> NH <sub>3</sub> ][Fe(HCOO) <sub>3</sub> ]                                                                               | 12.5                               | S9  |
|                                                                                   | [NH <sub>4</sub> ][Fe(HCOO) <sub>3</sub> ]                                                                                               | 9.4                                | S10 |
| (4 <sup>12</sup> ·6 <sup>3</sup> ) (4 <sup>9</sup> ·6 <sup>6</sup> )              | [(CH <sub>3</sub> ) <sub>2</sub> NH <sub>2</sub> ][Fe <sup>II</sup> Fe <sup>III</sup> (HCOO) <sub>6</sub> ]                              | 37                                 | S11 |
|                                                                                   | [(C <sub>2</sub> H <sub>5</sub> ) <sub>2</sub> NH <sub>2</sub> ][Fe <sup>II</sup> Fe <sup>III</sup> (HCOO) <sub>6</sub> ]                | 39                                 | S12 |
|                                                                                   | [C <sub>2</sub> H <sub>5</sub> NH <sub>3</sub> ][Fe <sup>II</sup> Fe <sup>III</sup> (HCOO) <sub>6</sub> ]                                | 39                                 | S12 |
|                                                                                   | [NH <sub>3</sub> (CH <sub>2</sub> ) <sub>4</sub> NH <sub>3</sub> ][Fe(HCOO) <sub>3</sub> ] <sub>2</sub>                                  | 19.8                               | S13 |
|                                                                                   | [CH <sub>3</sub> NH <sub>3</sub> ][Fe <sup>III</sup> Fe <sup>II</sup> (HCO <sub>2</sub> ) <sub>6</sub> ]                                 | 40                                 | S14 |
| (4 <sup>12</sup> ·6 <sup>3</sup> ) (4 <sup>9</sup> ·6 <sup>6</sup> ) <sub>2</sub> | [(CH <sub>3</sub> ) <sub>2</sub> NH <sub>2</sub> ] <sub>2</sub> [Fe <sup>III</sup> Fe <sup>II</sup> <sub>2</sub> (HCOO) <sub>9</sub> ]   | 33                                 | S15 |
|                                                                                   | [CH <sub>3</sub> NH <sub>2</sub> (CH <sub>2</sub> ) <sub>2</sub> NH <sub>2</sub> CH <sub>3</sub> ][Fe <sub>2</sub> (HCOO) <sub>6</sub> ] | 19.8                               | S16 |
|                                                                                   | [H <sub>2</sub> meen·H <sub>2</sub> O][Fe <sup>III</sup> (Fe <sup>II</sup> ) <sub>2</sub> (HCOO) <sub>9</sub> ]                          | 31.09                              | S17 |

|                                                      |                                                                                             |       |           |
|------------------------------------------------------|---------------------------------------------------------------------------------------------|-------|-----------|
|                                                      | $[\text{H}_2\text{dimeen}][\text{Fe}^{\text{III}}(\text{Fe}^{\text{II}})_2(\text{HCOO})_9]$ | 28.97 | S17       |
|                                                      | $[\text{H}_2\text{dieten}][\text{Fe}^{\text{III}}(\text{Fe}^{\text{II}})_2(\text{HCOO})_9]$ | 25.67 | S17       |
| $(4^6 \cdot 5^3 \cdot 6)_2(4^8 \cdot 5^4 \cdot 6^3)$ | 1                                                                                           | 18    | This work |
|                                                      | 2                                                                                           | 16    | This work |
|                                                      | 3                                                                                           | 16    | This work |
|                                                      | 4                                                                                           | 20    | This work |

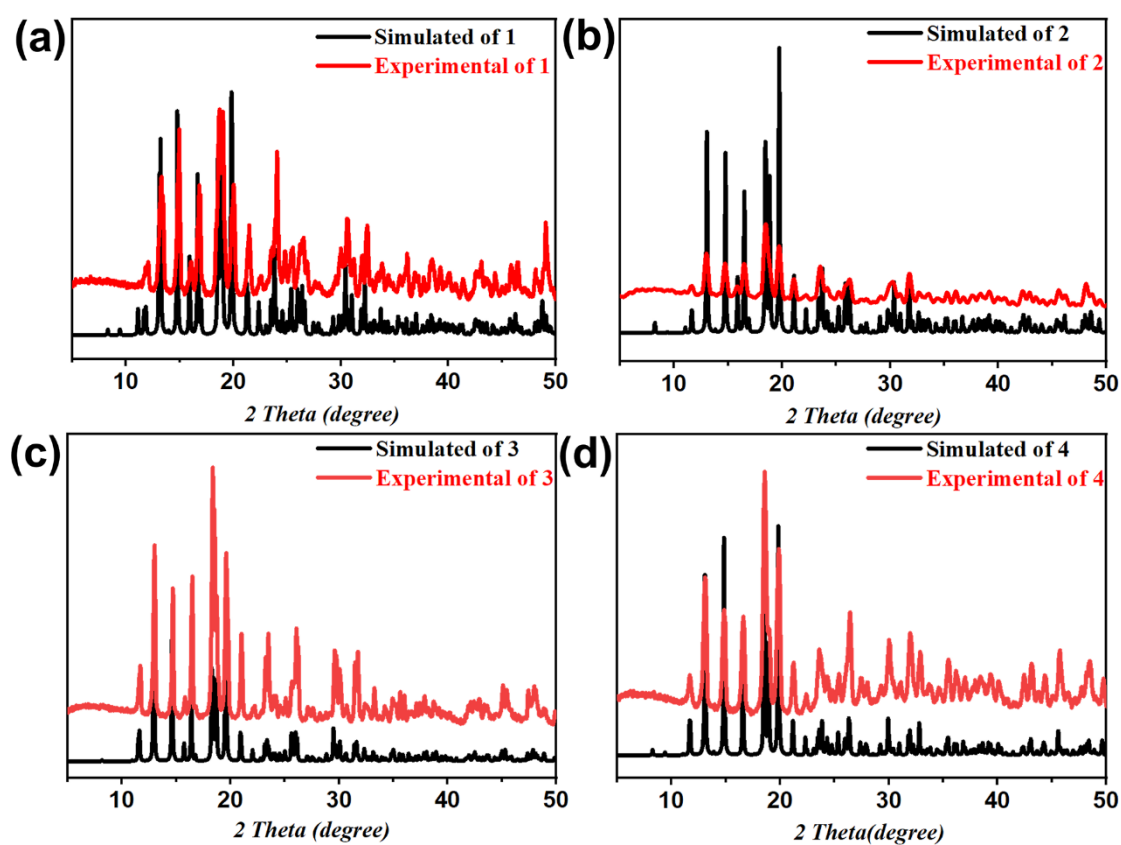

Figure S1. PXRD of 1, 2, 3 and 4.

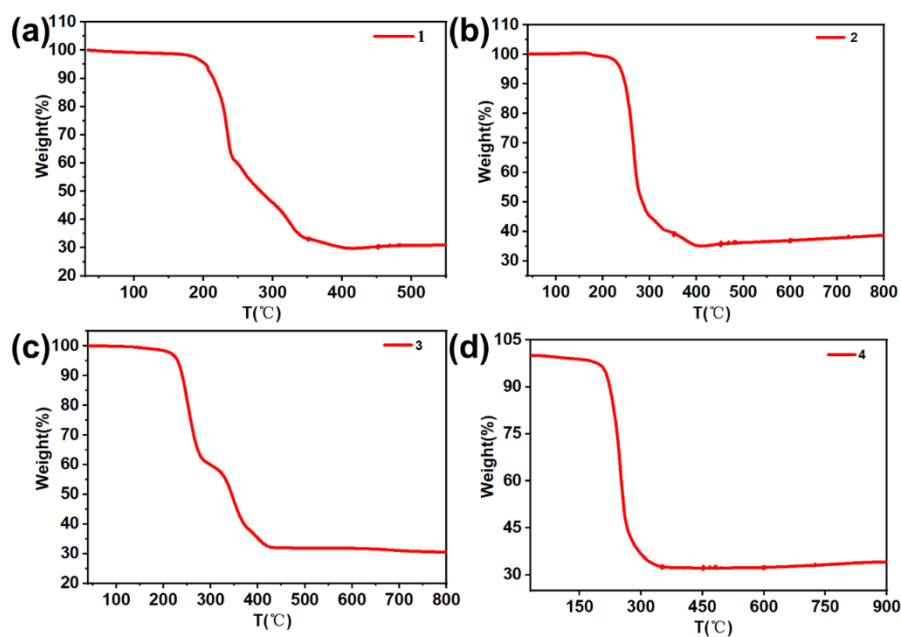

**Figure S2.** The TGA curves of **1**, **2**, **3** and **4** with the heating rate of  $10 \text{ K min}^{-1}$  under  $\text{N}_2$  atmosphere.

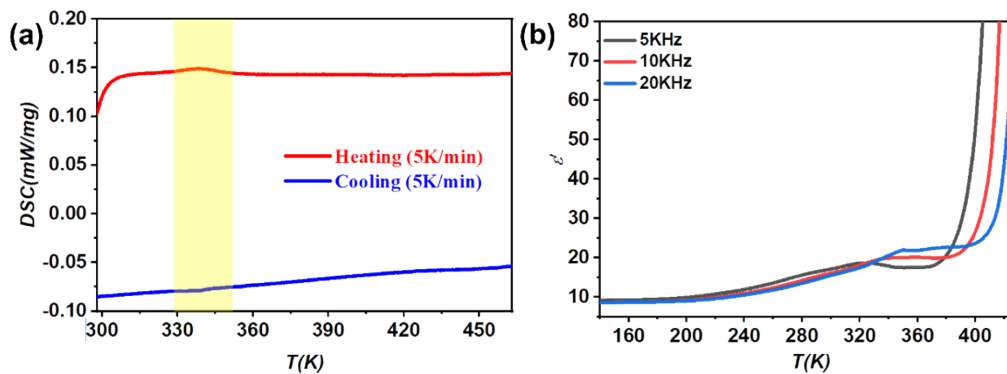

**Figure S3.** (a) DSC curves of **3** in the heating–cooling cycle. (b) Real dielectric part of the constant ( $\epsilon'$ ) of **3** measured at 5 kHz, 10 kHz and 20 kHz upon the heating process.

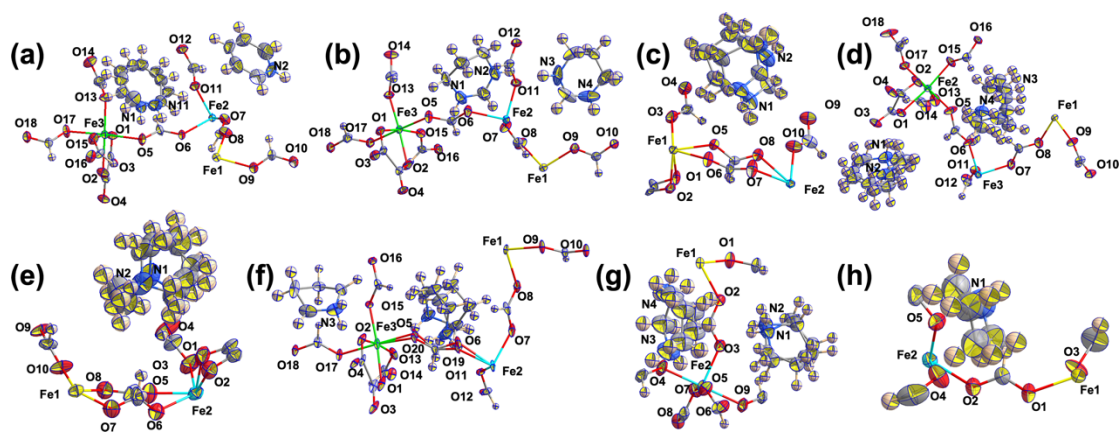

**Figure S4.** (a)-(h) the ellipsoid (50 % for C, N, Fe, O and 20% for H) plot of atoms in the asymmetric unit for **1**, **2LTP**, **2HTP**, **3LTP**, **3HTP**, **4LTP**, **4ITP** and **4HTP**.



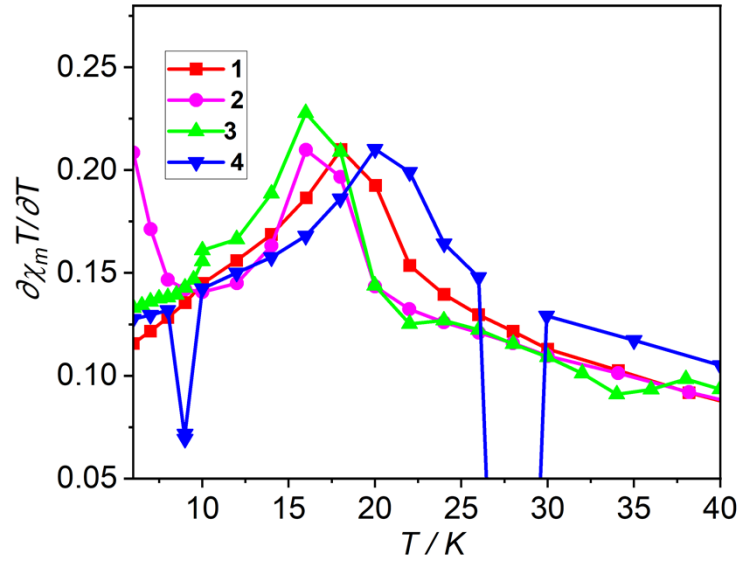

Figure S7. The derivative curve of  $\chi_m T$  vs  $T$  plots at low temperature.

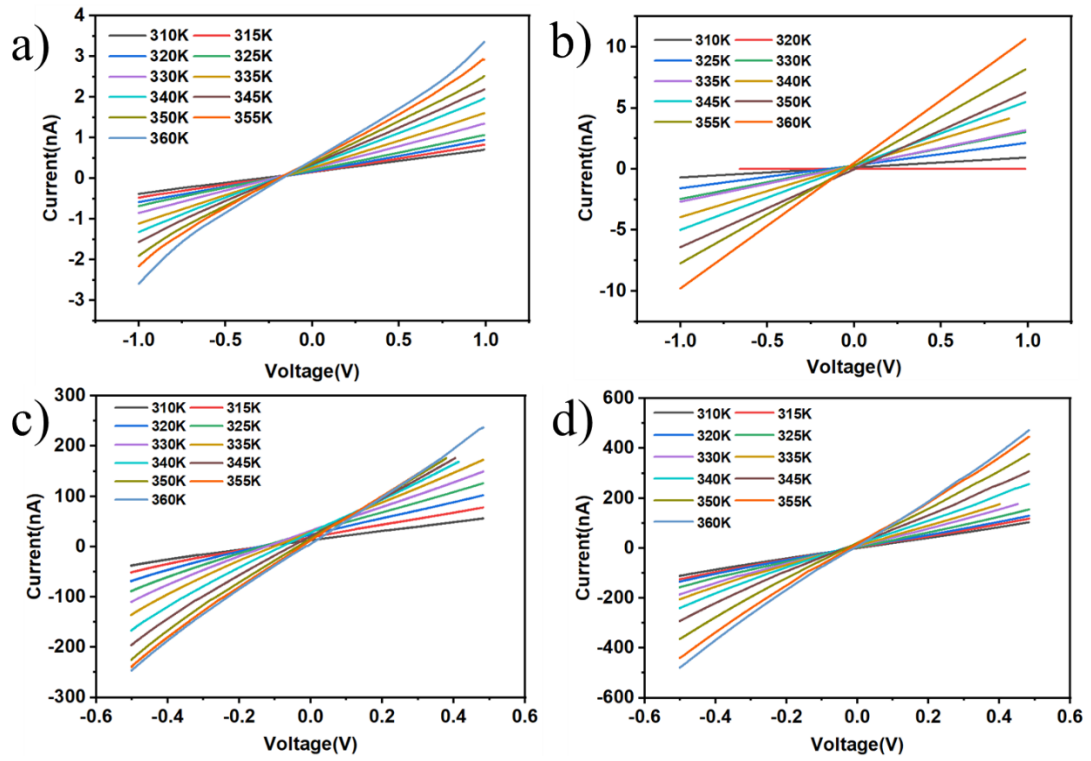

Figure S8 a)-d) Voltage-current curves at different temperatures of 1-4.

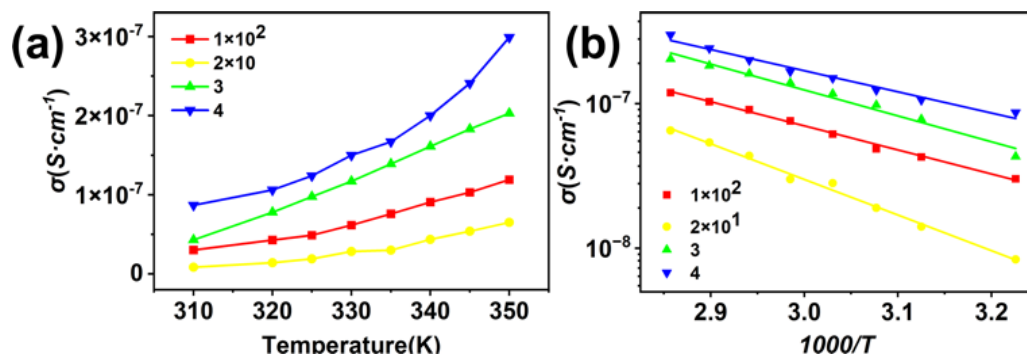

**Figure S9.** a) Variable-temperature conductivity measurement of 1-4. b) The logarithmic plots of the temperature-dependent conductivity versus  $1000/T$  of 1-4, where the solid line represents the Arrhenius fitting.

#### References:

- S1. G.-H. Ni, Y.-X. Sun, C.-X. Ji, Y.-W. Jin, M.-Y. Liu, J.-P. Zhao and F.-C. Liu, *Cryst. Growth Des.*, 2022, **22**, 3428–3434.
- S2. (a) G. M. Sheldrick, *Acta Crystallogr. Sect. C-Struct. Chem.*, 2015, **71**, 3-8. (b) W. A. Paciorek, M. Meyer and G. Chapuis, *Acta Crystallogr. Sect. A*, 1999, **55**, 543-557. (c) L. J. Bourhis, O. V. Dolomanov, R. J. Gildea, J. A. Howard and H. Puschmann, *Acta Crystallogr. Sect. A*, 2015, **71**, 59-75.
- S3. Y. Tian, J. Cong, S. Shen, Y. Chai, L. Yan, S. Wang and Y. Sun, *Phys. Status Solidi RRL*, 2014, **8**, 91.
- S4. M. Mączka, A. Gągor, M. Ptak, W. Paraguassu, T. A. de Silva, A. Sieradzki and A. Pikul, *Chem. Mater.*, 2017, **29**, 2264.
- S5. L. Cañadillas-Delgado, L. Mazzuca, S. Ling, M. J. Cliffe and O. Fabelo, *Inorg. Chem.*, 2025, **64**, 7348.
- S6. A. Ciupa, M. Mączka, A. Gągor, A. Pikul, E. Kucharska, J. Hanuza and A. Sieradzki, *Polyhedron*, 2015, **85**, 137.
- S7. V. Paredes-García, I. Rojas, R. Madrid, A. Vega, E. Navarro-Moratalla, W. Cañón-Mancisidor, E. Spodine and D. Venegas-Yazigi, *New J. Chem.*, 2013, **37**, 2120.
- S8. K.-L. Hu, M. Kurmoo Dr, Z. Wang and S. Gao, *Chem. Eur. J.*, 2009, **15**, 12050.
- S9. M. MączKA, K. Pasińska, M. Ptak, W. Paraguassu, T. A. D. Silva, A. Sieradzki and A. Pikul, *Phys. Chem. Chem. Phys.*, 2016, **18**, 31653.
- S10. G.-C. Xu, W. Zhang, X.-M. Ma, Y.-H. Chen, L. Zhang, H.-L. Cai, Z.-M. Wang, R.-G. Xiong and S. Gao, *J. Am. Chem. Soc.*, 2011, **133**, 14948.
- S11. K. Hagen, S. G. Naik, B. H. Huynh, A. Masello and G. Christou, *J. Am. Chem. Soc.*, 2009, **131**, 7516.
- S12. M. MączKA, A. Ciupa, A. Gągor, A. Sieradzki, A. Pikul and M. Ptak, *J. Mater. Chem. C*, 2016, **4**, 1186.
- S13. R. Shang, S. Chen, K.-L. Hu, B.-W. Wang, Z.-M. Wang and S. Gao, *Chem. Eur. J.*, 2016, **22**, 6199.
- S14. J. Zhao, W. Wang, S. Han, Q. Li, N. Li, F. Liu and X. Bu, *Acta Chim. Sinica*, 2020, **78**, 1223.
- S15. K.-H. Jin, S.-Y. Wang, K. Wang, B. Xia, Y.-Z. Tong, Y. Ma and Q.-L. Wang, *Inorg. Chem. Comm.*, 2019, **105**, 26.
- S16. M.-Y. Li, M. Kurmoo, Z.-M. Wang and S. Gao, *Chem. Asian J.*, 2011, **6**, 3084.
- S17. Q.-Y. Yan, S. D. Han, T. Xu, C.-X. Ji, L.-L. Lv, Z.-Q. Yao, J.-P. Zhao and F.-C. Liu, *Chem. Commun.*, 2025, **61**, 16412.
